# Supplementary material for: Divergent Chemical Cues Elicit Seed Collecting by Ants in an Obligate Multi-Species Mutualism in Lowland Amazonia
Source: PLOS journal article supplement (doi:10.1371/journal.pone.0015822), 2010-12-30
Supplement: S2 (10.1371/journal.pone.0015822.s002) [file journal.pone.0015822.s002]

**Table S1.** Results of exploratory seed-carrying assays with volatile compounds, presented individually and in blends.

| Compound or blend                    | Amount (µg per seed) <sup>a</sup> | Seeds presented total (# per colony) | Seeds carried total (# per colony) | Blanks presented total (# per colony) | Blanks carried total (# per colony) | Location <sup>b</sup> | Date          |
|--------------------------------------|-----------------------------------|--------------------------------------|------------------------------------|---------------------------------------|-------------------------------------|-----------------------|---------------|
| 6-MMS                                | 10                                | <b>24</b> (3,6,3,6,3,3)              | <b>1</b> (1,0,0,0,0,0)             | <b>24</b> (3,6,3,6,3,3)               | <b>0</b>                            | CC                    | October, 2004 |
|                                      | 50                                | <b>26</b> (5,12,3,3,3,3)             | <b>2</b> (0,1,0,1,0)               | <b>26</b> (5,12,3,3,3,3)              | <b>2</b> (1,1,0,0,0)                | CC                    | October, 2004 |
|                                      | 100                               | <b>18</b> (3,3,6,3,3,3)              | <b>1</b> (0,0,0,1,0)               | <b>18</b> (3,3,6,3,3,3)               | <b>3</b> (0,0,3,0,0)                | CC                    | October, 2004 |
| Benzothiazole                        | 10                                | <b>22</b> (6,8,3,5)                  | <b>2</b> (2,0,0,0)                 | <b>22</b> (6,8,3,5)                   | <b>1</b> (1,0,0,0)                  | CC                    | October, 2004 |
|                                      | 50                                | <b>19</b> (3,8,3,5)                  | <b>0</b>                           | <b>19</b> (3,8,3,5)                   | <b>2</b> (0,2,0,0)                  | CC                    | October, 2004 |
|                                      | 100                               | <b>22</b> (6,8,3,5)                  | <b>0</b>                           | <b>22</b> (6,8,3,5)                   | <b>3</b> (1,2,0,0)                  | CC                    | October, 2004 |
| Vanillin                             | 10                                | <b>23</b> (11,6,3,3)                 | <b>7</b> (2,1,2,2)                 | <b>23</b> (11,6,3,3)                  | <b>0</b>                            | CC                    | October, 2004 |
|                                      | 50                                | <b>36</b> (13,9,6,3,3,2)             | <b>12</b> (5,3,3,0,1,0)            | <b>36</b> (13,9,6,3,3,2)              | <b>1</b> (1,0,0,0,0,0)              | CC                    | October, 2004 |
|                                      | 100                               | <b>21</b> (3,3,6,3,3,3)              | <b>2</b> (0,1,0,0,1,0)             | <b>21</b> (3,3,6,3,3,3)               | <b>1</b> (0,0,0,1,0,0)              | CC                    | October, 2004 |
| 1-(2-Hydroxy-6-methylphenyl)ethanone | 10                                | <b>9</b> (3,3,3)                     | <b>0 0</b>                         | <b>9</b> (3,3,3)                      | <b>1</b> (0,0,1)                    | CC                    | October, 2004 |
|                                      | 50                                | <b>15</b> (6,6,3)                    | <b>0 0</b>                         | <b>15</b> (6,6,3)                     | <b>0</b>                            | CC                    | October, 2004 |
|                                      | 100                               | <b>15</b> (6,6,3)                    | <b>0 0</b>                         | <b>15</b> (6,6,3)                     | <b>0</b>                            | CC                    | October, 2004 |
| 2,4-Dihydroxyacetophenone            | 10                                | <b>20</b> (3,6,3,8)                  | <b>3</b> (2,0,0,1)                 | <b>20</b> (3,6,3,8)                   | <b>4</b> (0,2,0,2)                  | CC                    | October, 2004 |
|                                      | 50                                | <b>20</b> (3,6,3,8)                  | <b>1</b> (1,0,0,0)                 | <b>20</b> (3,6,3,8)                   | <b>0</b>                            | CC                    | October, 2004 |
|                                      | 100                               | <b>20</b> (3,6,3,8)                  | <b>2</b> (0,1,0,1)                 | <b>20</b> (3,6,3,8)                   | <b>1</b> (1,0,0,0)                  | CC                    | October, 2004 |
| Geranyl linalool                     | 10                                | <b>12</b> (5,5,2)                    | <b>0</b>                           | <b>12</b> (5,5,2)                     | <b>0</b>                            | CICRA                 | October, 2005 |
|                                      | 100                               | <b>10</b> (5,5)                      | <b>1</b> (1,0)                     | <b>10</b> (5,5)                       | <b>0</b>                            | CICRA                 | October, 2005 |
| <b>Blends<sup>c</sup></b>            |                                   |                                      |                                    |                                       |                                     |                       |               |
| <i>A. gracile</i> -like blend        | 80                                | <b>15</b> (5,5,5)                    | <b>3</b> (2,1,0)                   | <b>15</b> (5,5,5)                     | <b>1</b> (1,0,0)                    | CICRA                 | October, 2005 |
|                                      | 240                               | <b>5</b> (5)                         | <b>1</b> (1)                       | <b>5</b> (5)                          | <b>0</b>                            | CICRA                 | October, 2005 |
| <i>C. uleana</i> -like blend         | 10                                | <b>15</b> (5,5,5)                    | <b>1</b> (1,0,0)                   | <b>15</b> (5,5,5)                     | <b>0</b>                            | CICRA                 | October, 2005 |
| EAD blend                            | 0.16                              | <b>20</b> (10,5,5)                   | <b>0</b>                           | <b>20</b> (10,5,5)                    | <b>0</b>                            | CICRA                 | October, 2006 |
|                                      | 1.6                               | <b>35</b> (15,10,5,5)                | <b>3</b> (3,0,0,0)                 | <b>35</b> (15,10,5,5)                 | <b>0</b>                            | CICRA                 | October, 2006 |
|                                      | 16                                | <b>15</b> (5,5,5)                    | <b>1</b> (1,0,0)                   | <b>15</b> (5,5,5)                     | <b>0</b>                            | CICRA                 | October, 2006 |

All treatments were applied to *P. laevigatum* seeds, were paired with solvent-treated controls and were observed for 20 min., as described for other seed-carrying assays in the main text. The first five compounds are those that Seidel et al. (1990) identified as prevalent among AG seeds.

<sup>a</sup> One seed-equivalent was generally the starting point, with additional concentrations calculated as multiple seed-equivalents. Amount of compounds in one seed-equivalent was based on the most current analyses of seed extracts available at the time the assays were performed. In 2004, concentrations were based on Seidel et al. (1990) and Davidson et al. (1990).

<sup>b</sup> Location: CC = Estacion Biologica Cocha Cashu; CICRA = Centro de Investigación y Capacitación Rio Los Amigos

<sup>c</sup> Blend compositions are detailed in Table S2.
