# Supplementary material for: Divergent Chemical Cues Elicit Seed Collecting by Ants in an Obligate Multi-Species Mutualism in Lowland Amazonia
Source: PLOS journal article supplement (doi:10.1371/journal.pone.0015822), 2010-12-30
Supplement: S3 (10.1371/journal.pone.0015822.s003) [file journal.pone.0015822.s003]

**Table S2.** Composition of blends mentioned in Table S1.

| Compound                   | µg per seed-equivalent            |                                  |           |
|----------------------------|-----------------------------------|----------------------------------|-----------|
|                            | <i>A. gracile</i> -<br>like blend | <i>C. uleana</i> -<br>like blend | EAD blend |
| Geranylinalool             | 48.00                             | 6.00                             | 0.1       |
| Geranylgeraniol            | 12.00                             | 0.39                             |           |
| Palmitic acid, ethyl ester | 7.00                              |                                  |           |
| Beta springene             | 4.00                              | 0.30                             |           |
| Linoleic acid, ethyl ester | 4.00                              | 0.05                             |           |
| Alpha springene            | 2.00                              | 0.20                             |           |
| Oleic acid, ethyl ester    | 2.00                              | 0.03                             |           |
| 6-MMS                      | 0.40                              |                                  | 0.02      |
| Cembrene                   | 0.40                              | 0.01                             |           |
| Heneicosane                | 0.08                              | 0.02                             |           |
| Hexadecanal                | 0.06                              | 0.02                             |           |
| Heptacosane                | 0.06                              | 0.01                             |           |
| Tridecane                  | 0.04                              |                                  |           |
| 1-Tetradecene              | 0.04                              |                                  |           |
| Beta caryophyllene         | 0.04                              |                                  |           |
| Squalene                   | 0.04                              | 3.00                             |           |
| Tricosane                  | 0.04                              | 0.01                             |           |
| Pentadecane                | 0.02                              |                                  |           |
| 3,5-Dimethoxytoluene       |                                   |                                  | 0.02      |
| Methyl anisate             |                                   |                                  | 0.01      |
| 3,5-Dimethoxybenzoate      |                                   |                                  | 0.01      |

*A. gracile* - and *C. uleana* -like blends were based on 2004 GC-MS analyses of hexane extracts of seeds and ethanol in which seeds had been stored, as described in the main text. The EAD blend was based on GC-MS and GC-EAD analyses of a fraction of *P. macrostachya* extract, as described by Youngsteadt et al. (2008). Blends were made from standard solutions in batches of 20 to 100 seed-equivalents each.
