# Supplementary material for: Divergent Chemical Cues Elicit Seed Collecting by Ants in an Obligate Multi-Species Mutualism in Lowland Amazonia
Source: PLOS journal article supplement (doi:10.1371/journal.pone.0015822), 2010-12-30
Supplement: S4 (10.1371/journal.pone.0015822.s004) [file journal.pone.0015822.s004]

**Table S3.** Results of exploratory seed-carrying assays with sugars and with combinations of sugars, amino acids and volatile compounds.

| Amount per seed |               |              |                      |            |                     | Seeds presented                | Seeds carried                  | Blanks presented               | Blanks carried                 |
|-----------------|---------------|--------------|----------------------|------------|---------------------|--------------------------------|--------------------------------|--------------------------------|--------------------------------|
| Glucose (µg)    | Fructose (µg) | Sucrose (µg) | Amino acid mix* (ng) | 6-MMS (µg) | Geranylinalool (µg) | <b>Total</b><br>(# per colony) | <b>Total</b><br>(# per colony) | <b>Total</b><br>(# per colony) | <b>Total</b><br>(# per colony) |
| 5               | 5             |              |                      |            |                     | <b>15</b> (5,5,5)              | <b>0</b>                       | <b>15</b> (5,5,5)              | <b>0</b>                       |
| 2.5             | 2.5           | 5            |                      |            |                     | <b>15</b> (5,5,5)              | <b>0</b>                       | <b>15</b> (5,5,5)              | <b>0</b>                       |
| 20              | 20            |              | 200                  |            |                     | <b>10</b> (5,5)                | <b>2</b> (1,1)                 | <b>10</b> (5,5)                | <b>0</b>                       |
| 10              | 10            | 20           | 200                  |            |                     | <b>10</b> (5,5)                | <b>0</b>                       | <b>10</b> (5,5)                | <b>0</b>                       |
| 50              | 50            |              |                      |            |                     | <b>13</b> (5,5,3)              | <b>0</b>                       | <b>13</b> (5,5,3)              | <b>0</b>                       |
| 50              | 50            |              | 200                  |            |                     | <b>13</b> (5,5,3)              | <b>0</b>                       | <b>13</b> (5,5,3)              | <b>0</b>                       |
| 50              | 50            |              | 200                  | 0.2        | 1                   | <b>13</b> (5,5,3)              | <b>0</b>                       | <b>13</b> (5,5,3)              | <b>0</b>                       |
|                 |               |              |                      | 0.2        | 1                   | <b>13</b> (5,5,3)              | <b>0</b>                       | <b>13</b> (5,5,3)              | <b>0</b>                       |

Treatments were applied to *P. laevigatum* seeds and were paired with solvent-treated controls. Seeds were observed for 20 min., as described in for other seed-carrying assays the main text. All assays were performed at CICRA in October, 2006.

\*The amino acid mix contained equal parts of alanine, glutamic acid, serine, threonine, asparagine, glycine, valine, isoleucine, phenylalanine, and tyrosine.
