# Supplementary material for: Divergent Chemical Cues Elicit Seed Collecting by Ants in an Obligate Multi-Species Mutualism in Lowland Amazonia
Source: PLOS journal article supplement (doi:10.1371/journal.pone.0015822), 2010-12-30
Supplement: S5 (10.1371/journal.pone.0015822.s005) [file journal.pone.0015822.s005]

**Table S4.** Results of ANOVA on ranks, testing for effects of treatment (dilute *A. gracile* extract alone or with the addition of glucose and fructose, sucrose or a combination of the three, matched for mass of sugar per seed) on the order in which ants retrieved test seeds.

| Source                         | df | SS   | <i>F</i> | <i>P</i> |
|--------------------------------|----|------|----------|----------|
| Treatment                      | 3  | 1.9  | 1.1      | 0.35     |
| Colony                         | 2  | 0.0  | 0.0      | 1.00     |
| Treatment x Colony Interaction | 6  | 11.3 | 3.4      | <0.01    |
| Error                          | 48 | 26.8 |          |          |
| Total                          | 59 | 40.0 |          |          |
